# Supplementary material for: Uncovering leading compounds for alzheimer’s disease treatment: mendelian randomization and virtual screening insights into plasma protein modulation
Source: Springer Nature journal article supplement (doi:10.1186/s40659-025-00598-2), 2025-04-05

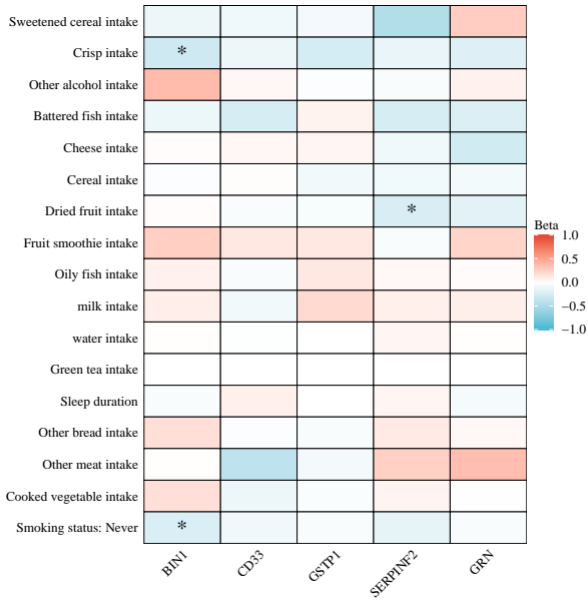

Supplement: MOESM2 [file 40659_2025_598_MOESM2_ESM.pdf]
